# Supplementary material for: Empirical identification and validation of tumor-targeting T cell receptors from circulation using autologous pancreatic tumor organoids
Source: PubMed Central journal article supplement (PMC8601084; doi:10.1136/jitc-2021-003213), 2021-11-16
Supplement: jitc-2021-003213supp002.pdf [file jitc-2021-003213supp002.pdf]

## Supplemental figure and table legends

**Figure S1** OpT cells recognize tumor but not normal cell. **(A)** Hematoxylin-eosin (H&E) staining of tumor organoids from patient 3, 10, 19 and 38. Scale bar, 100 $\mu$ m. **(B, C)** Representative images showing that pt19 opT **(B)** and pt38 opT cells **(C)** kill autologous tumor organoids more efficiently than PBMC and in a time-dependent manner. Scale bar, 100 $\mu$ m. **(D)** Representative images for mouse mammary tumor organoids or normal mammary tissue alone or co-cultured with autologous opT cells at different time points (Day 2 and 4) under light microscopy. Scale bar, 100 $\mu$ m. **(E)** Bar graphs showing the IFN- $\gamma$  secretion by mouse opT cells after co-cultured with autologous mammary tumors or normal cells for 2 days. **(F)** Cell Phenotype for PBMC and opT cells from pt19 by flow cytometry.

**Figure S2** **(A)** Changes in IFN $\gamma$  secretion by sorted T cells from pt38 opT after 24h in the presence or absence of autologous tumor organoids from pt38. **(B)** Immuno-staining for MHC-I, MHC-II, PD-L1, HLA-E and CEACAM1 in tumor organoids from pt10. **(C)** Changes in IFN $\gamma$  secretion by opT cells after 24h of pretreatment with anti-PD1, PDL1 and TIM3 blocking antibodies or NKG2A, TIM3, TIGIT and LAG3 protein, in the presence or absence of autologous tumor organoids from pt3. \*, p<0.05. p-value calculated using two-tailed, unpaired t-test. **(D)** Sorted populations of CD3+ opT cells from pt3. **(E)** IFN $\gamma$  secretion by pt3 sorted CD3+ opT cells after 24h of pretreatment with recombinant protein NKG2A (final 2  $\mu$ g/ml), in the presence or absence of autologous tumor organoids from pt3. N.S., not significant. \*\*, p<0.01. p-value calculated using two-tailed, unpaired t-test.

**Figure S3** Expression of T cell activation marker (CD69) in TCR-expressing SKW-3 cells exposed to autologous (pt38) tumor organoids. Lower table,  $\alpha$  chains details for OSR11-1 and OSR11-2 which shares the same  $\beta$  chain as is shown for OSR11 (Fig. 4B).

## Using organoids to identify anti-tumor TCRs from blood

**Table S1** (A) Patient information. (B) Total cell number for each patient' opT cells generated.

(C) Antibodies and clones used in the CyTOF panel.

**Table S2** (A) T cell surface markers to identify naive and memory T cell by CytoF. (B) Detailed

sequence information for the top 10 TCRs in opT and TIL for patient 3. (C) The  $\beta$  chain of top 5

TCRs from the opT cells and TILs were compared with a TCR database from 120 healthy

individuals. (D) The percentage (%) of the top 5 TCRs from opT cells were represented in

PBMCs from pt3, 10 and 38, respectively.

**Table S3** Antibodies used in the flow cytometry for immune checkpoint expression.
