# Supplementary material for: Empirical identification and validation of tumor-targeting T cell receptors from circulation using autologous pancreatic tumor organoids
Source: PubMed Central journal article supplement (PMC8601084; doi:10.1136/jitc-2021-003213), 2021-11-16
Supplement: jitc-2021-003213supp003.pdf [file jitc-2021-003213supp003.pdf]

Table S1

A

| Patient ID | Age | Sex | Diagnosis | Histology      | Tumor Stage | Degree of apoptosis/necrosis        | Degree of Differentiation | IHC based Subtypes | Tumor Grade | Met         |
|------------|-----|-----|-----------|----------------|-------------|-------------------------------------|---------------------------|--------------------|-------------|-------------|
| Pt3        | 51  | F   | PDAC      | Adenocarcinoma | 4           | mild apoptosis, no necrosis         | poorly differentiated     | Classical          | 3           | Lung        |
| Pt10       | 67  | F   | PDAC      | Adenocarcinoma | 4           | no apoptosis, regions of necrosis   | well-differentiated       | Basal              | 1           | Liver       |
| Pt19       | 80  | F   | PDAC      | Adenocarcinoma | 4           | mild apoptosis, regions of necrosis | moderately differentiated | Mixed              | 2           | Liver       |
| Pt38       | 65  | M   | PDAC      | Adenocarcinoma | 4           | no apoptosis, no necrosis           | moderately differentiated | Mixed              | 2           | Liver, Lung |

| Patient ID | KRAS mut | GNAS mut | CDKN2A/2B mut | TP53 mut | SMAD4 mut | ARID1A mut | HER2 mut | DDR gene mut | Vital Status (months) |
|------------|----------|----------|---------------|----------|-----------|------------|----------|--------------|-----------------------|
| Pt3        | 1        | 0        | 1             | 1        | 0         | 0          | 1        | 0            | 35                    |
| Pt10       | 1        | 0        | 1             | 1        | 0         | 0          | 0        | CHEK1        | 22 (alive)            |
| Pt38       | 1        | 0        | 0             | 1        | 0         | 0          | 0        | 0            | 6                     |
| Pt19       | 1        | 0        | 1             | 1        | 1         | 0          | 0        | 0            | NA                    |

B

| Patient ID | Start from PBMCs ( $\cdot 10^6$ ) | Final cell number ( $\cdot 10^6$ ) |                              |
|------------|-----------------------------------|------------------------------------|------------------------------|
|            |                                   | PBMCs (without tumor stimulation)  | opT (with tumor stimulation) |
| Pt3        | 0.3                               | 3.3                                | 216.0                        |
| Pt10       | 0.3                               | 0.7                                | 3.4                          |
| Pt38       | 0.3                               | 0.9                                | 4.5                          |
| Pt19       | 0.3                               | 0.5                                | 12.3                         |

C

| Antibody           | Clone    | Isotypes | Source         | Cat. No |
|--------------------|----------|----------|----------------|---------|
| CD3                | UCHT1    | 115In    | BWH CytoF core | V17836  |
| CD4                | RPA T4   | 145Nd    | BWH CytoF core | V13137  |
| CD8a               | RPA T8   | 146Nd    | BWH CytoF core | V19727  |
| CD19               | HIB19    | 160Gd    | BWH CytoF core | V15339  |
| CD56               | NCAM16.2 | 162Dy    | BWH CytoF core | V19817  |
| TCR Va7.2          | 3C10     | 169Tm    | BWH CytoF core | V20089  |
| CD161              | HP-3G10  | 164Dy    | BWH CytoF core | V18502  |
| TCR $\gamma\delta$ | B1       | 173Yb    | BWH CytoF core | V19099  |
| iNKT               | 6B11     | 163Dy    | BWH CytoF core | V13633  |
| CD45RA             | HI100    | 142Nd    | BWH CytoF core | V12362  |
| CD45RO             | UCHL1    | 147Sm    | BWH CytoF core | V17586  |
| CD197/CCR7         | G043H7   | 159Tb    | BWH CytoF core | V15498  |
| CD103              | Ber-ACT8 | 151Eu    | BWH CytoF core | V17952  |
| CD27               | O323     | 141Pr    | BWH CytoF core | V17009  |
| CD28               | CD28.2   | 148Nd    | BWH CytoF core | V19038  |
| CD62L/L-Selectin   | DREG-56  | 174Yb    | BWH CytoF core | V16535  |
| CD95/FAS           | DX2      | 156Gd    | BWH CytoF core | V14020  |
| CD117/C-kit        | 104D2    | 158Gd    | BWH CytoF core | V18238  |
| CD314/NKG2D        | 5C6      | 166Er    | BWH CytoF core | V10008  |
| CD154/CD40L        | 24-31    | 154Sm    | BWH CytoF core | V18377  |
| CD25               | M-A251   | 149Sm    | BWH CytoF core | V17042  |
| CD44               | IM7      | 113In    | BWH CytoF core | V16308  |
| CD69               | FN50     | 153Eu    | BWH CytoF core | V19261  |
| CD279/PD1          | EH12.2H7 | 143Nd    | BWH CytoF core | V17017  |
| CD152/CTLA-4       | L3D10    | 152Sm    | BWH CytoF core | V16490  |
| CD196/CCR6         | G034E3   | 168Er    | BWH CytoF core | V18535  |
| CD194/CCR4         | L291H4   | 150Nd    | BWH CytoF core | V15278  |
| CXCR3              | G025H7   | 161Dy    | BWH CytoF core | V20053  |
