# Supplementary material for: Empirical identification and validation of tumor-targeting T cell receptors from circulation using autologous pancreatic tumor organoids
Source: PubMed Central journal article supplement (PMC8601084; doi:10.1136/jitc-2021-003213), 2021-11-16
Supplement: jitc-2021-003213supp004.pdf [file jitc-2021-003213supp004.pdf]

Table S2

A

| Phenotype Key                |                                        |
|------------------------------|----------------------------------------|
| T cell                       | CD3+                                   |
| CD4+ or CD8+                 |                                        |
| Tissue-resident memory (TRM) | CD69+,CD103-,CCR7-,CD45RO+             |
| CD103+ TRM                   | CD69+,CD103+,CCR7-,CD45RO+             |
| Naive                        | CD69-,CD103-,CD95-,CD28+,CCR7+,CD45RO- |
| Stem Cell Memory             | CD69-,CD103-,CD95+,CD28+,CCR7+,CD45RO- |
| Central memory               | CD69-,CD103-,CD95+,CD28+,CCR7+,CD45RO+ |
| Transitional memory          | CD69-,CD103-,CD95+,CD28+,CCR7-,CD45RO+ |
| Effector memory              | CD69-,CD103-,CD95+,CD28-,CCR7-,CD45RO+ |
| Terminal effector            | CD69-,CD103-,CD95+,CD28-,CCR7-,CD45RO- |

B

|         | TCR Rank | Frequency (%) | $\beta$ chain CDR3 sequence | V_resolved          | D_resolved    | J_resolved    |
|---------|----------|---------------|-----------------------------|---------------------|---------------|---------------|
| Pt3 opT | 1        | 81.0          | CASSSRDRMNTAEFF             | TCRBV06-05*01       | TCRBD01-01*01 | TCRBJ01-01*01 |
|         | 2        | 9.3           | CASSLWSTPTDTQYF             | TCRBV07-03*01       | TCRBD02-01    | TCRBJ02-03*01 |
|         | 3        | 5.9           | CASSANRAPNEKLF              | TCRBV27-01*01       | TCRBD01-01*01 | TCRBJ01-04*01 |
|         | 4        | 1.6           | CASSPTIETQYF                | TCRBV06-01*01       | TCRBD02-01    | TCRBJ02-05*01 |
|         | 5        | 1.3           | CASRSSNPQHF                 | TCRBV19-01*01       | TCRBD02-01    | TCRBJ01-05*01 |
|         | 6        | 0.20          | CASSLAGEVEDTQYF             | TCRBV07-07*01       | TCRBD02-01*02 | TCRBJ02-03*01 |
|         | 7        | 0.13          | CASSTGDEQFF                 | TCRBV02-01          | TCRBD01-01*01 | TCRBJ02-01*01 |
|         | 8        | 0.11          | CASSEQRGGFNEQFF             | TCRBV02-01          | TCRBD02-01*01 | TCRBJ02-01*01 |
|         | 9        | 0.04          | CASSTLRDRGLANTGELFF         | TCRBV28-01*01       | TCRBD01-01*01 | TCRBJ02-02*01 |
|         | 10       | 0.03          | CASSYSDSGKIYYEQYF           | TCRBV06-07*01       | TCRBD02-01*02 | TCRBJ02-07*01 |
| Pt3 TIL | 1        | 50.8          | CASSPTIETQYF                | TCRBV06-01*01       | TCRBD02-01    | TCRBJ02-05*01 |
|         | 2        | 30.5          | CASSQDGIAGETQYF             | TCRBV04-01*01       | TCRBD02-01*01 | TCRBJ02-05*01 |
|         | 3        | 14.1          | CSAADPYSYEQYF               | TCRBV20             | TCRBD02-01    | TCRBJ02-07*01 |
|         | 4        | 2.8           | CASSGDSSYGYTF               | TCRBV12-03/12-04*01 | TCRBD01-01*01 | TCRBJ01-02*01 |
|         | 5        | 1.3           | CASRPSRATNEKLF              | TCRBV27-01*01       | unknown       | TCRBJ01-04*01 |
|         | 6        | 0.28          | CATSRDQGLASNEQFF            | TCRBV15-01*02       | TCRBD02-01    | TCRBJ02-01*01 |
|         | 7        | 0.04          | CASSEDRRYGYTF               | TCRBV07-02          | TCRBD01-01*01 | TCRBJ01-02*01 |
|         | 8        | 0.01          | CAWSVRGLPQHF                | TCRBV30-01*01       | TCRBD02-01*01 | TCRBJ01-05*01 |
|         | 9#       | 0.01          | CASSRVGLDYEYQYF             | TCRBV21-01*01       | TCRBD02-01    | TCRBJ02-07*01 |
|         | 10       | 0.01          | CASRSSNPQHF                 | TCRBV19-01*01       | TCRBD02-01    | TCRBJ01-05*01 |

(Same background color: overlapped TCRs between Pt3 opT and TIL; #: overlapped with rank 52 TCR in Pt3 opT)

C

|          | TCR ID | TCR Rank | Percentage (%) in |           |           |
|----------|--------|----------|-------------------|-----------|-----------|
|          |        |          | Pt3 PBMC          | Pt10 PBMC | Pt38 PBMC |
| Pt3 opT  | OSR 1  | 1        | 2.3               | —         | —         |
|          | OSR 2  | 2        | 0.7               | —         | —         |
|          | OSR 3  | 3        | 0.5               | —         | —         |
|          | OSR 4  | 4        | 8.6               | —         | —         |
|          | OSR 5  | 5        | 2.4               | —         | —         |
| Pt10 opT | OSR 6  | 1        | —                 | 0.2       | —         |
|          | OSR 7  | 2        | —                 | 0.7       | —         |
|          | OSR 8  | 3        | —                 | —         | —         |
|          | OSR 9  | 4        | —                 | 2.6       | —         |
|          | OSR 10 | 5        | —                 | —         | —         |
| Pt38 opT | OSR 11 | 1        | —                 | —         | —         |
|          | OSR 12 | 2        | —                 | —         | 1.7       |
|          | OSR 13 | 3        | —                 | —         | 0.5       |
|          | OSR 14 | 4        | —                 | —         | 0.5       |
|          | OSR 15 | 5        | —                 | —         | 2.0       |

(—, undetected.)

D

|          | TCR ID | TCR Rank | No. of healthy controls with the same TCR in total 120 | Highest TCR frequency |
|----------|--------|----------|--------------------------------------------------------|-----------------------|
| Pt3 opT  | OSR 1  | 1        | 0                                                      | —                     |
|          | OSR 2  | 2        | 1                                                      | 3.00E-06              |
|          | OSR 3  | 3        | 0                                                      | —                     |
|          | OSR 4  | 4        | 0                                                      | —                     |
|          | OSR 5  | 5        | 6                                                      | 4.3569E-06            |
| Pt10 opT | OSR 6  | 1        | 0                                                      | —                     |
|          | OSR 7  | 2        | 0                                                      | —                     |
|          | OSR 8  | 3        | 0                                                      | —                     |
|          | OSR 9  | 4        | 0                                                      | —                     |
|          | OSR 10 | 5        | 0                                                      | —                     |
| Pt38 opT | OSR 11 | 1        | 25                                                     | 1.15821E-05           |
|          | OSR 12 | 2        | 8                                                      | 7.2296E-06            |
|          | OSR 13 | 3        | 0                                                      | —                     |
|          | OSR 14 | 4        | 0                                                      | —                     |
|          | OSR 15 | 5        | 0                                                      | —                     |
| Pt3 TIL  | TIR 1  | 1        | 0                                                      | —                     |
|          | TIR 2  | 2        | 0                                                      | —                     |
|          | TIR 3  | 3        | 2                                                      | 6.1257E-06            |
|          | TIR 4  | 4        | 0                                                      | —                     |
|          | TIR 5  | 5        | 0                                                      | —                     |

(—, undetected.)
