# Supplementary material for: Empirical identification and validation of tumor-targeting T cell receptors from circulation using autologous pancreatic tumor organoids
Source: PubMed Central journal article supplement (PMC8601084; doi:10.1136/jitc-2021-003213), 2021-11-16
Supplement: jitc-2021-003213supp005.pdf [file jitc-2021-003213supp005.pdf]

Table S3

| Antibody              | Color            | Clone        | Company         | Catalogue No. |
|-----------------------|------------------|--------------|-----------------|---------------|
| CD3                   | PE               | HIT3a        | Biolegend       | 300308        |
| CD3                   | BV605            | UCHT1        | Biolegend       | 300460        |
| CD4                   | APC              | OKT4         | Biolegend       | 317416        |
| CD4                   | BV650            | OKT4         | Biolegend       | 317435        |
| CD8                   | FITC             | SK1          | BD              | 347313        |
| CD8                   | PerCP            | SK1          | Biolegend       | 344707        |
| LAG-3 (CD223)         | BV 605           | 11C3C65      | Biolegend       | 369323        |
| TIM-3 (CD366)         | APC              | F38-2E2      | Biolegend       | 345011        |
| TIGIT (VSTM3)         | APC              | A15153G      | Biolegend       | 372705        |
| BTLA (CD272)          | PE               | MIH26        | Biolegend       | 344505        |
| GITR (CD357)          | PerCP/Cyanine5.5 | 108-17       | Biolegend       | 371217        |
| CD96                  | PE               | NK92.39      | Biolegend       | 338405        |
| NKG2A                 | BV711            | 131411 (RUO) | BD              | 747919        |
| KIR2DL1 (CD158a)      | PE               | REA284       | Miltenyi Biotec | 130-120-586   |
| KIR2DL2/DL3 (CD158b)  | PerCP            | DX27         | Miltenyi Biotec | 130-099-700   |
| KIR2DL4 (CD158d)      | FITC             | REA768       | Miltenyi Biotec | 130-112-536   |
| KIR2DL5 (CD158f)      | PE               | REA955       | Miltenyi Biotec | 130-115-911   |
| KIR3DL1/DL2(CD158e/k) | FITC             | REA970       | Miltenyi Biotec | 130-116-280   |
| KIR3DL3 (CD158z)      | AF647            | 1136B        | R&D systems     | FAB8919R-025  |
