# Supplementary material for: Empirical identification and validation of tumor-targeting T cell receptors from circulation using autologous pancreatic tumor organoids
Source: PubMed Central journal article supplement (PMC8601084; doi:10.1136/jitc-2021-003213), 2021-11-16

Fig. S1

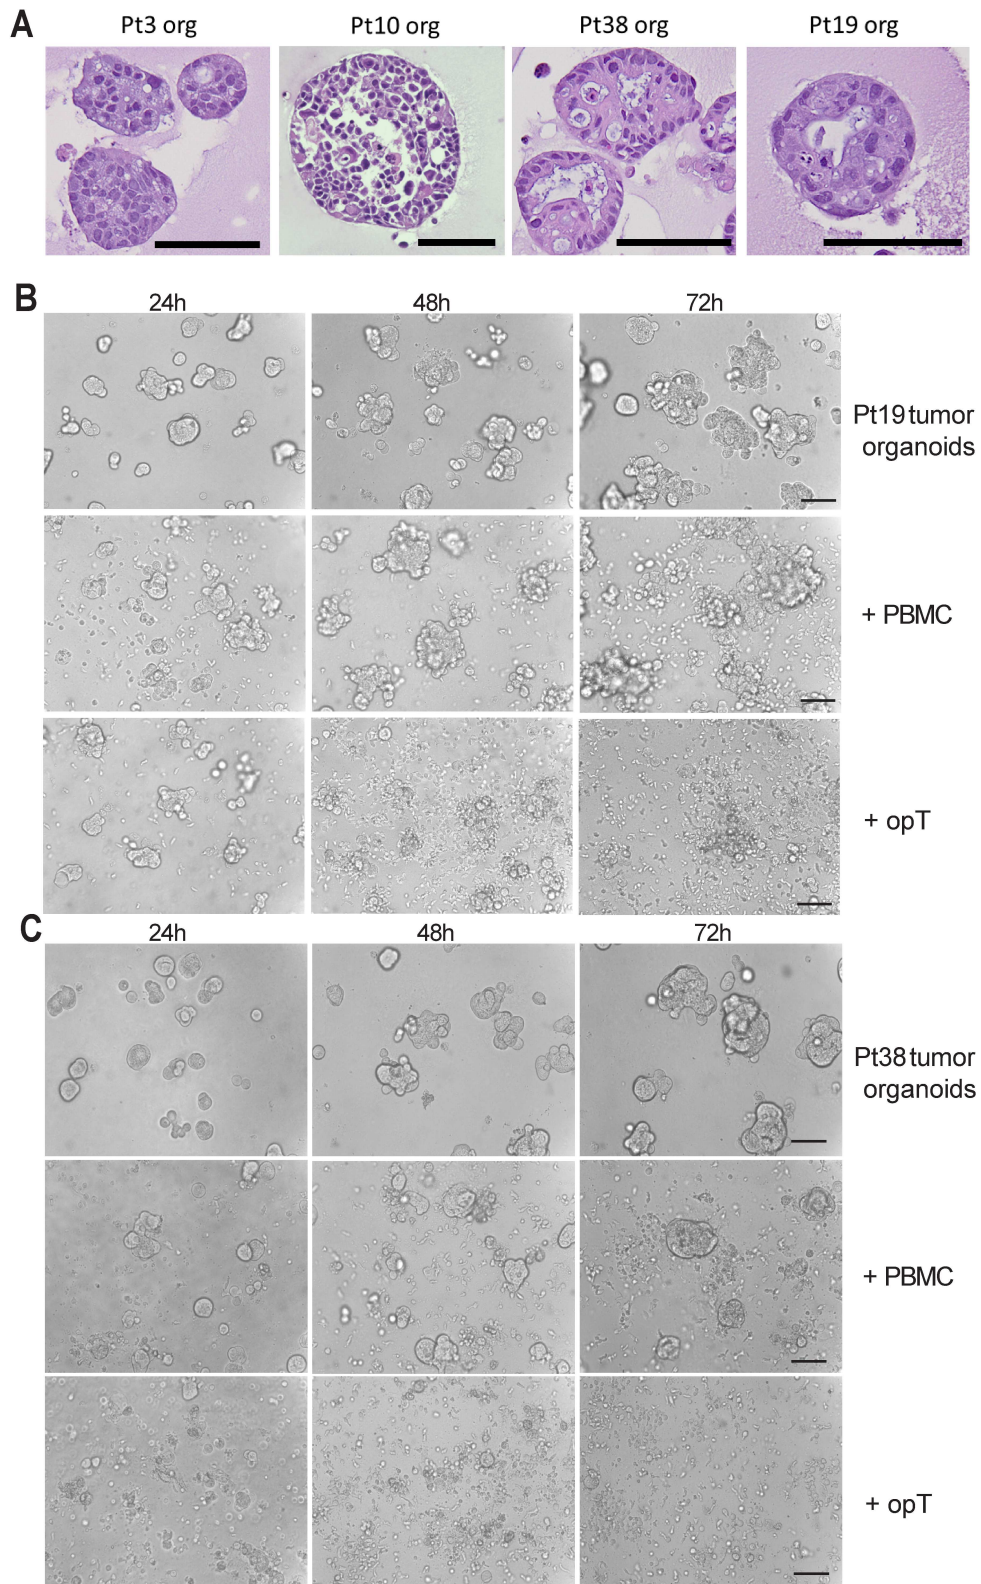

Supplement: jitc-2021-003213supp007.pdf [file jitc-2021-003213supp007.pdf]
